# Supplementary material
Source: Springer Nature journal article supplement (https://www.springermedizin.de/resource/supplementary/12958_2008_443_MOESM1_ESM.pdf/9567900)

# ROC Curve

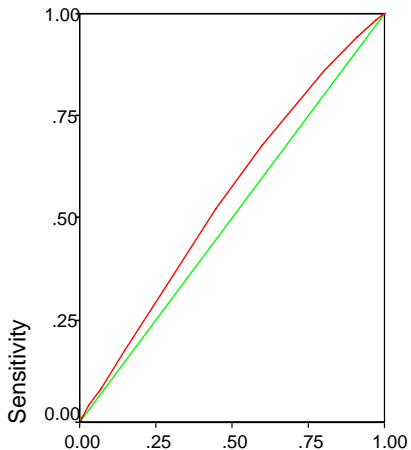

1 - Specificity

Diagonal segments are produced by ties.

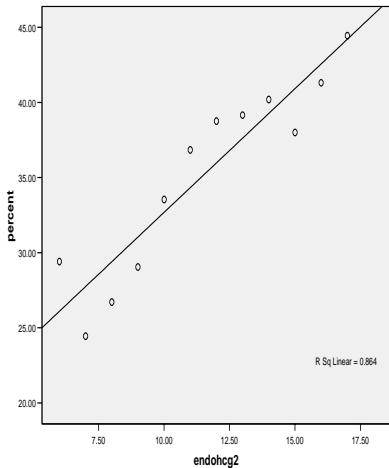

Supplement: MOESM1 [file 9567900]
